# Supplementary material for: Surface Modification of Okara Cellulose Crystals with Phenolic Acids to Prepare Multifunction Emulsifier with Antioxidant Capacity and Lipolysis Retardation Effect
Source: MDPI journal article supplement (doi:10.3390/foods13020184), 2024-01-05
Supplement: s1 [file s1]

**Table S1** Study on in vitro stability of the modified OC and digestion of the emulsions stabilized by modified OC

| GIT phase            | Digestive fluids<br>[composition; pH]                                                                                                                                                                                                                                      | <i>In vitro</i> digestion                                                                                                                                                                                                     |                                                                                                                                                                                                                                                                                                                 |
|----------------------|----------------------------------------------------------------------------------------------------------------------------------------------------------------------------------------------------------------------------------------------------------------------------|-------------------------------------------------------------------------------------------------------------------------------------------------------------------------------------------------------------------------------|-----------------------------------------------------------------------------------------------------------------------------------------------------------------------------------------------------------------------------------------------------------------------------------------------------------------|
|                      |                                                                                                                                                                                                                                                                            | OC-G and OC-T                                                                                                                                                                                                                 | emulsions stabilized by the cellulosic materials or BSA                                                                                                                                                                                                                                                         |
| Oral                 | <b>simulated saliva fluid (SSF)</b><br>[KCl (15.1 mM), KH <sub>2</sub> PO <sub>4</sub> (3.7 mM), NaHCO <sub>3</sub> (13.6 mM), MgCl <sub>2</sub> (0.15 mM), and (NH <sub>4</sub> ) <sub>2</sub> CO <sub>3</sub> (0.06 mM); pH 7.0]                                         | -                                                                                                                                                                                                                             | emulsion (5 mL) + SSF (4 mL) + $\alpha$ -amylase (750 units/mL)<br>↓<br>add CaCl <sub>2</sub> (0.1 M, 75 mL) and make up to 10 mL with DI water<br>↓ 37°C, 2 min<br>“bolus”                                                                                                                                     |
| Gastric              | <b>simulated gastric fluid (SGF)</b><br>[KCl (6.9 mM), KH <sub>2</sub> PO <sub>4</sub> (0.9 mM), NaHCO <sub>3</sub> (25 mM), NaCl (47.2 mM), MgCl <sub>2</sub> (H <sub>2</sub> O) <sub>6</sub> (0.1 mM), (NH <sub>4</sub> ) <sub>2</sub> CO <sub>3</sub> (0.5 mM); pH 2.5] | modified OC + SGF (1:1, <i>wt/v</i> ) + pepsins (25,000 units/mL)<br>↓<br>periodically take out a small aliquot of digestive fluids<br>← 37 °C, 2 h                                                                           | bolus + SGF (7.5 mL) + CaCl <sub>2</sub> (0.1 M, 15 mL) + pepsin (25,000 units/mL)<br>↓<br>adjust to pH 3.0 using HCl (1 M) and make up to 20 mL with DI water<br>↓ 37 °C, 120 min<br>“chyme”                                                                                                                   |
| Intestine            | <b>stimulated intestinal fluid (SIF)</b><br>[KCl (6.8 mM), KH <sub>2</sub> PO <sub>4</sub> (0.8 mM), NaHCO <sub>3</sub> (85 mM), NaCl (38.4 mM), and MgCl <sub>2</sub> (H <sub>2</sub> O) <sub>6</sub> (0.33 mM); pH 7.0]                                                  | add SIF (1:1, <i>wt/v</i> ) +lipase (5,600 units/mL) + bile salts (160 mM, 2.5 mL)<br>↓<br>adjust to pH 7.0 using NaOH (1 M L <sup>-1</sup> )<br>↓<br>periodically take out a small aliquot of digestive fluids<br>← 37 °C, 4 | chyme + SIF (6 mL) + pancreatic lipase (5,600 units/mL)<br>↓<br>add bile salt solution (160 mM, 2.5 mL) and CaCl <sub>2</sub> (0.1 M, 120 mL)<br>↓<br>adjust to pH 7.0 using NaOH (1 M) and make up to 40 mL using DI water<br>↓ 37 °C, 120 min<br>terminate the reaction by placing the mixture in an ice bath |
| <b>Determination</b> |                                                                                                                                                                                                                                                                            | TPC<br>DPPH radical scavenging ability                                                                                                                                                                                        | FFA content                                                                                                                                                                                                                                                                                                     |
